# Supplementary material for: Substance abuse in pregnant women. Experiences from a special child welfare clinic in Norway
Source: PubMed Central journal article supplement (PMC2242799; doi:10.1186/1471-2458-7-322), 2007-11-11
Supplement: 1471-2458-7-322-S1.pdf [file 1471-2458-7-322-S1.pdf]

Table 1. Level of education, employment and economy of the 102 users of Special Child Welfare Clinic (SCWC) in Kristiansand, Norway, in the years 1994-2002.

| Special child welfare clinic                     |    | Comparison group N=168* |    |      |         |
|--------------------------------------------------|----|-------------------------|----|------|---------|
| Education N=94                                   | n  | %                       | n  | %    | p-value |
| Not finished lower secondary education (<9 yrs)  | 10 | (11)                    | 0  | (0)  | 0.000   |
| Finished lower secondary education (9 yrs)       | 58 | (62)                    | 19 | (11) | 0.000   |
| Not finished upper secondary education (<12 yrs) | 14 | (15)                    | 0  | (0)  | 0.000   |
| Finished upper secondary education (12 yrs)      | 10 | (11)                    | 67 | (40) | 0.000   |
| College/university                               | 2  | (2)                     | 82 | (50) | 0.000   |
| Employment N=98                                  |    |                         |    |      |         |
| Employed full time                               | 10 | (10)                    |    |      |         |
| Employed part time                               | 5  | (5)                     |    |      |         |
| Unemployed                                       | 36 | (37)                    |    |      |         |
| Student                                          | 13 | (13)                    |    |      |         |
| Home with child                                  | 10 | (10)                    |    |      |         |
| Disabled                                         | 6  | (6)                     |    |      |         |
| Community support activity                       | 12 | (12)                    |    |      |         |
| Institution patient                              | 6  | (6)                     |    |      |         |
| Economy N=96                                     |    |                         |    |      |         |
| Employment                                       | 13 | (14)                    |    |      |         |
| Student                                          | 15 | (16)                    |    |      |         |
| Transitional child benefits                      | 10 | (10)                    |    |      |         |
| Unemployment benefits                            | 3  | (3)                     |    |      |         |
| Rehabilitation benefits                          | 17 | (18)                    |    |      |         |
| Social security benefits                         | 38 | (40)                    |    |      |         |

\*The educational level of the comparison group was registered in the questionnaire, but has not changed in the years after the child was born.
