# Supplementary material for: Substance abuse in pregnant women. Experiences from a special child welfare clinic in Norway
Source: PubMed Central journal article supplement (PMC2242799; doi:10.1186/1471-2458-7-322), 2007-11-11
Supplement: 1471-2458-7-322-S2.pdf [file 1471-2458-7-322-S2.pdf]

Table 2. Pattern of substance abuse in the users of Special child welfare clinic (SCWC) in Kristiansand, Norway in 1994-2002. N is more than 59 because of polydrug use.

| Drugs used before contact with SCWC | Drugs used during pregnancy |      | Difference |      | Preferred drug |       |    |      |
|-------------------------------------|-----------------------------|------|------------|------|----------------|-------|----|------|
|                                     | n                           | (%)  | n          | (%)  | n              | (%)   |    |      |
| N=59                                |                             |      |            |      |                |       |    |      |
| Cannabis                            | 58                          | (98) | 30         | (48) | 28             | (48)  | 8  | (14) |
| Central stimulating                 | 50                          | (85) | 27         | (44) | 23             | (46)  | 28 | (47) |
| LSD                                 | 14                          | (24) | 0          | (0)  | 14             | (100) |    |      |
| Crack                               | 6                           | (10) | 1          | (2)  | 5              | (83)  |    |      |
| Opiates                             | 35                          | (59) | 17         | (27) | 18             | (51)  | 17 | (29) |
| Sedatives/analgesic/alcohol*        | 38                          | (61) | 25         | (42) | 13             | (34)  | 5  | (9)  |
| Daily smoking                       | 56                          | (95) | 47         | (80) | 9              | (16)  |    |      |

\*All who abused alcohol also abused sedatives/analgesics.
