# Supplementary material for: Substance abuse in pregnant women. Experiences from a special child welfare clinic in Norway
Source: PubMed Central journal article supplement (PMC2242799; doi:10.1186/1471-2458-7-322), 2007-11-11
Supplement: 1471-2458-7-322-S3.pdf [file 1471-2458-7-322-S3.pdf]

Table 3. Health and socio-economic issues and their relation to substance abuse during pregnancy among the users of SCWC in Kristiansand, Norway in 1994-2002.

| <i>Substance abuse in pregnancy</i>          | Short time use<br>N=34 |      | Long time use<br>N=25 |      | Total<br>N=59 |      | p-value | <i>Comparison group</i><br>N=169 |      |         |
|----------------------------------------------|------------------------|------|-----------------------|------|---------------|------|---------|----------------------------------|------|---------|
|                                              | n                      | (%)  | n                     | (%)  | n             | (%)  |         | n                                | (%)  | p-value |
| <i>Substance abuse</i>                       |                        |      |                       |      |               |      |         |                                  |      |         |
| No alcohol pregnancy                         | 23                     | (68) | 9                     | (36) | 32            | (54) | 0.016   | 123                              | (76) | 0.001   |
| No smoking in pregnancy                      | 11                     | (31) | 1                     | (4)  | 12            | (18) | 0.008   | 113                              | (70) | 0.000   |
| Substance abuse<10 years                     | 13                     | (38) | 11                    | (44) | 24            | (40) | 0.656   |                                  |      |         |
| Childs father abuse substances               | 24                     | (71) | 22                    | (88) | 67            | (78) | 0.111   |                                  |      |         |
| Substance abuse in immediate family          | 13                     | (38) | 7                     | (28) | 20            | (34) | 0.412   | 42                               | (25) | 0.001   |
| Never treated for substance abuse            | 12                     | (62) | 7                     | (28) | 28            | (48) | 0.010   |                                  |      |         |
| <i>Family/social situation</i>               |                        |      |                       |      |               |      |         |                                  |      |         |
| Single mother                                | 22                     | (65) | 18                    | (72) | 40            | (69) | 0.554   |                                  |      |         |
| Older siblings                               | 23                     | (68) | 20                    | (80) | 43            | (73) | 0.292   |                                  |      |         |
| Community support                            | 12                     | (35) | 16                    | (64) | 28            | (48) | 0.029   |                                  |      |         |
| Convicted                                    | 14                     | (42) | 8                     | (32) | 22            | (37) | 0.471   |                                  |      |         |
| Regular at apointments                       | 25                     | (74) | 13                    | (52) | 38            | (64) | 0.088   |                                  |      |         |
| <i>Health</i>                                |                        |      |                       |      |               |      |         |                                  |      |         |
| Prenatal care time less than mean (154 days) | 14                     | (16) | 12                    | (48) | 26            | (44) | 0.602   |                                  |      |         |
| Treatment for psychiatric diagnosis*         | 9                      | (27) | 8                     | (32) | 17            | (29) | 0.643   |                                  |      |         |
| Victim of rape as adult                      | 20                     | (57) | 6                     | (24) | 26            | (42) | 0.000   | 7                                | (4)  | 0.000   |
| Hepatitis C+B                                | 16                     | (47) | 12                    | (48) | 29            | (48) | 0.943   |                                  |      |         |
| Sexual abuse in childhood                    | 18                     | (53) | 10                    | (40) | 28            | (48) | 0.325   | 12                               | (7)  | 0.000   |

\*Major depression and anxiety disorder.
