# Supplementary material for: Substance abuse in pregnant women. Experiences from a special child welfare clinic in Norway
Source: PubMed Central journal article supplement (PMC2242799; doi:10.1186/1471-2458-7-322), 2007-11-11
Supplement: 1471-2458-7-322-S4.pdf [file 1471-2458-7-322-S4.pdf]

Table 4. Association between psychosocial variables and the ability to stop substance abuse by the end of the first trimester (0=not stopping, 1=stop) among the users of SCWC in Kristiansand, Norway, in 1994-2002, from a multivariate logistic regression analysis.

|                               |           | OR (crude) | CI         | p-value | OR (adj.)* | CI         | p-value |
|-------------------------------|-----------|------------|------------|---------|------------|------------|---------|
| Smoking in pregnancy          | Yes (ref) | 1.0        |            |         | 1.0        |            |         |
|                               | No        | 11.5       | (1.4-96.2) | 0.024   | 9.7        | (1.1-90.6) | 0.045   |
| Treatment for drug addiction  | Yes (ref) | 1.0        |            |         | 1.0        |            |         |
|                               | No        | 4.2        | (1.4-12.7) | 0.012   | 3.5        | (1.0-12.7) | 0.052   |
| Exposed to rape               | No (ref)  | 1.0        |            |         | 1.0        |            |         |
|                               | Yes       | 4.0        | (1.3-12.6) | 0.017   | 5.3        | (1.5-19.0) | 0.011   |
| Being regular at appointments | No (ref)  | 1.0        |            |         |            |            |         |
|                               | Yes       | 3.0        | (1.0- 9.0) | 0.048   | Ns         |            |         |
| Use of alcohol in pregnancy   | Yes (ref) | 1.0        |            |         |            |            |         |
|                               | No        | 3.7        | (1.3-11.0) | 0.018   | Ns         |            |         |

\*Adjusted values by forward selection.
